# Supplementary material for: Predictors of outcome among children with biliary atresia: a single centre trial
Source: PeerJ. 2025 Feb 24;13:e19001. doi: 10.7717/peerj.19001 (PMC11867042; doi:10.7717/peerj.19001)
Supplement: Data S1 [file peerj-13-19001-s002.xlsx]

## Sheet: Sheet1
Gender	Operation weight (kg)	Operation age (day)	Preoperative GGT (U/L)	Survival (0=survival, 1=death)	Survival time (months)	Clearance of jaundice (0=no clear, 1=clear)	Progressed disease (failed Kasai and awaiting liver transplant，0=yes, 1=no)	Preoperative	ALT (U/L)	AST (U/L)	GGT (U/L)	TBI (μmol/L)	DBI (μmol/L)	One month after operation	ALT (U/L)	AST (U/L)	GGT (U/L)	TBI (μmol/L)	DBI (μmol/L)	Three months after operation	ALT (U/L)	AST (U/L)	GGT (U/L)	TBI (μmol/L)	DBI (μmol/L)	Clearance of jaundice (0=no clear, 1=clear)	Six months after operation	ALT (U/L)	AST (U/L)	GGT (U/L)	TBI (μmol/L)	DBI (μmol/L)	Clearance of jaundice (0=no clear, 1=clear)
0	6	64	1853	0	24	0	1		184	165	1853	102.5	90.2		147	167	1733	83.4	72.7		167	147	1733	83.4	72.7	0		153	51	1448	115.4	97.8	0
0	4	59	1807.2	0	24		1		91.6	120	1807.2	124.4	88.7		103.2	177	2793.6	145.3	103.4		101.6	219	5168.8	214	148.3	0
0	3.2	37	1568.3	0	24		1		154	96	1568.3	240.1	148.6		58	49.6	1343.0	227.2	153.3
1	3.7	54	1490.2	0	24	1	0		109.6	113	1490.2	140.6	105.8		15	56	842	61.8	52.9		27	86	681	19.9	12.9	1		24	33	98	11	2.9	1
1	6	88	1440	0	24	0	1		140.1	187.5	1440	188	149		191	287	1681	253	198		113	152	867	125	116	0		56.3	68.1	264.2	49	25	0
0	3.53	32	1438.2	0	24	1	1		25.7	41.9	1438.2	235.3	169.6		23.4	66.7	900.8	7.8	2.8		36.1	47	95.1	6.8	3.2	1		16.9	37	10.3	7.7	3.4	1
0	4.1	67	1358	0	24		1		69	126	1358	127.5	105.7		85	92	1042	57	46.7
1	5.6	88	1350	0	24	1	0		154	56.2	1350	115.3	69.4		105	6	1868.6	21.6	13.9		150	120	2107	15	7	1		30	39	119	2	1.3	1
1	5.3	87	1263	0	24	0	1		170	146	1263	109.8	89.5		180	185.3	1076.1	87.9	65.5		170	190.1	2122.1	55	40.3	0		83	182	1816	37.5	20	0
0	3.6	45	1190	0	24	0	1		100	158	1190	145.4	124.6		94.4	148.4	886.6	65.7	56.8		36.2	118.5	703.6	138.7	113.1	0		102.9	158.3	541.6	138.3	121.1	0
1	5.7	87	1147.5	1	14		1		58	214	1147.5	167.4	195.6		246	177	2113	25	20.8
0	5.3	89	1146.7	0	24	0	1		400	302	1146.7	174.7	117.1		36	128	1184	97.6	84.1		25	141	1392	70	50.3	0		25	141	1392	70	50.3	0
1	4.5	89	1143	0	24	1	1		335	206	1143	164.8	127		192	136.0	1889.1	44.6	38.0		73	37.0	641.0	9.4	5.8	1		57	57.6	104.7	9.1	5	1
1	5.7	63	1130.6	1	9	0	1		88.4	185.8	1130.6	173.5	138.9		58.7	117.1	1101.7	143.5	114.9		48	137.7	1121.7	174.5	138.9	0		23.6	61.3	735	113.3	66.9	0
0	5	55	1123.6	0	24		1		181.7	193.6	1123.6	271.7	208.2		33.7	226.9	1442	279.2	219.2
0	4.1	51	1085	0	24	1	0		195	129	1085	242.6	176.6		94	29.8	1824.9	71.7	45.6		66	23.7	941.6	9.7	2.6	1		51	62	219	7.6	2.4	1
1	6	89	1084.1	0	24	1	1		110	13.5	1084.1	126.5	89.8		57	48	575	21	15.4		64	20	614	9.5	7	1		84	29	590	11.9	7.3	1
0	4.6	89	1060	0	24	1	1		285	112	1060	90.8	62		125	31	2291	44	34		70	8	784	12.8	8.1	1		101	91	441	6.3	3.3	1
0	6	66	1058	0	24	1	1		168.4	181.5	1045.3	151.2	114.6		55	76	1072	37.6	31.4		59	73	682	32	27	0		22	37	211	5.2	2.7	1
0	4.36	50	1037.1	0	24	1	0		183.1	234.3	1037.1	133.1	106.5		33.2	178.5	2448	62.2	51.1		175	274	2473	33.7	26.8	0		168.2	162.2	990	17.9	14.1	1
1	5.8	72	1032	0	24	1	1		205	248	1032	157	119.3		256	350.2	1726.6	148	72.9		142	85	775	19.9	13.1	1		75	39	209	13.2	8.5	1
0	3.8	52	1024.6	0	24	0	1		99.5	93.1	1024.6	158.6	134.4		98.7	38.5	529.5	95.3	77.8		165.1	139	1366	46.3	37.8	0		153.1	178.6	1871.9	53.2	40.6	0
0	5	77	989.4	1	8	1	0		123.8	157	989.4	140.8	97.2		21	100	1331	101	87		12	41	681	39.1	29.4	0		15	24	167	16.7	5.7	1
0	5.5	61	984.5	0	24	1	0		407	201.7	984.5	110.5	75.5		65	51	307	11.8	8.2		27	27	15	5.1	2.4	1		88	112.6	72.4	6.9	3.3	1
0	3	31	970	0	24	1	0		274.8	264	970	281.8	176		84	97	979	52.2	40.2		37	68	348	8.5	10.7	1		26	57	261	6.4	3.9	1
1	4.2	80	835.2	0	24	1	1		175.7	266.3	835.2	133	110.2		103.9	160.2	623.8	121	106		57.7	173.4	1085.6	22.1	15.3	0		66.5	74.3	182.4	13.2	4.3	1
1	4	40	805.9	0	24	1	0		87	71.5	805.9	143.3	81.3		30	123	2577.3	34	28.54		166	155.0	2408.2	10.6	7.4	1		139	85	454.0	13.4	8.5	1
0	4.9	46	742.5	0	24	0	1		69.3	87.4	742.5	133.5	109.3		157.8	114.1	1174.2	167.7	139.9		118	94	208	192.6	90.5	0		38	57	106	115	35	0
0	4.7	71	740	1	12	0	1		106	221	740	111	90.7		136.3	150.7	1615.8	35.3	30.7		237	192	1238.5	45	53.8	0		434.6	357.7	1460.2	74	72.2	0
0	4.3	71	735.5	0	24	1	0		79	142.7	735.5	125	99.6		36.5	139.2	287	111.5	94.1		31	106	153	73	34	0		22.8	46.5	86	19.6	5.7	1
1	3	60	727.3	1	3	1	0		159.1	198	727.3	162.6	100.3		83	102	1423	53	19		68	83	389	24	9.4	0		29	47	105	10.8	3.9	1
0	4.3	71	723	0	24		1		194	122	723	139.3	106.3		261	81.9	3021.4	94.2	43		198	355	874	68.6	54	0
0	5.5	87	700	0	24	1	0		283	331	700	143	124.2		70.4	102.9	492	25.7	21.8		79.5	115.8	329	34.7	26.2	0		35	48.2	155	18.6	8.9	1
0	4.1	34	663	1	20	0	1		100	97	663	204.2	154.6		63	123.3	1327.9	139	108		259	308	1967	126.4	105.7	0		76	214	1245	174.9	142.6	0
0	4.2	64	640.8	0	24	1	1		107.8	103	640.8	131.4	87.8		106	276	1934	144.9	120.7		94	168	1248	103	67	0		42	67	167	19.6	15	1
0	4.8	45	624.5	0	24	1	1		249.1	246.8	624.5	139.8	110.4		48	134	357	75	49		65.3	168.9	1254.4	22	18.1	0		34	68	534	16.3	10.8	1
0	2.5	42	607	0	24	1	0		116	50	607	124.2	71.4		128	99	1248	92.5	64.5		74	103	914	11.7	6.4	1		37	14.9	995	14.9	6.9	1
0	5.2	45	599.7	0	24	1	0		42.1	95.3	599.7	203.1	157.7		148	133	778	29.6	25.1		26.6	68.8	702.2	9.6	6.1	1		49.8	51.7	245.3	5.4	2	1
1	3.1	44	599.1	0	24	1	0		104	125.7	599.1	160	131.7		113	98	1104	31.4	22.2		82	85	1215	12	9.8	1		99	80	338	6.3	3.3	1
1	5.6	51	565.9	0	24		1		169	200	565.9	229.8	148.2		114.7	249	1233.6	207.1	144.1
1	5	66	553	0	24		1		155	113	553	142.2	117.2		94	147	1645	36	30.1		47	87	1297	47.9	41.9	0
0	4.4	87	527	0	24	1	0		203	190	527	123.4	101.3		37	129	413	73	56.9		25	78	135	17.5	9.7	1		21	34	67	4.7	4.1	1
0	2.81	37	521	0	24	1	0		31.5	68.2	521	66.1	48.2		29	59	249	60.8	43.5		33	57.3	189.2	44.2	34.3	0		35.7	33.5	116	9.4	8.1	1
1	5	61	503	0	24		1		100	155	503	161	135.3		296	233	1191.1	111.9	100.7
0	3.9	55	485.1	0	24	1	0		132.9	139	485.1	172	114.8		43	135	1536	53.2	38.5		45	134	1334	16	10	1		35	135	451	14.6	8.4	1
0	4.4	60	463	0	24	1	1		73	119.1	463.1	98.2	89.1		140.1	138.2	680.3	59.7	55.4		131	126	342	33.5	26.9	0		66.8	53.6	136	13.9	9.6	1
0	3.8	50	435.1	0	24	1	0		80.7	256	435.1	171.7	117.5		52	182	688.2	122	84.7		35	125	1406	11.8	7.5	1		23	49	106	3.5	2.8	1
1	3.2	50	418.6	0	24	1	1		155	146.4	418.6	86.1	74.2		184	90	346	21.6	16.9		39.2	40.9	55.8	6.1	2.8	1		30.5	33.8	22.4	3.4	1.5	1
1	6.2	77	401	0	24	0	1		183	157	401	134.7	120.4		360.2	257.6	1592.1	106	82.2		169.1	166.4	1756.5	34.2	27.7	0		273.8	256.9	1353.5	138	111.3	0
0	6.2	55	387	0	24	1	0		178	111	387	140.5	109.7		100	44	1231	16.8	11.3		30	31	225	6.2	2.9	1		86	66	417	10	6,5	1
0	6	37	378.3	0	24	1	1		54.7	76.3	378.3	150.2	121.5		76.8	104	468	109	168		68.4	91	341	82.7	125	0		28.5	34	168	17.6	12.3	1
0	6	88	366	1	15		1		416	278	366	183.8	150.8		106	169	270	70.5	58.5
0	6.5	34	363	0	24	1	1		100	108	363	165.2	117.3		23	28	462	31.2	26.9		203.2	100.3	939.1	15.5	10.7	1		231	94	497	7.7	2.6	1
0	5.6	72	353	0	24	0	1		187	196	353	182.2	143.6		55.7	224.6	1812.7	165	128.2		47	144.5	162.9	416.5	322.2	0		31	74.2	92	186	157	0
0	6.2	81	353	0	24	1	0		82	79	353	148.8	112.7		125	185	1386	49.6	39		180	261	1653.5	68	53.2	0		97	136	346	10.1	5.4	1
0	4.2	57	342.1	0	24	0	1		52.9	92.8	342.1	122.5	91.4		160.8	199.2	1123.3	138.3	110		134.4	192	813	125	95.2	0		64	58	431	66	38.4	0
1	4.4	89	341.1	0	24	1	0		79.3	98.3	341.1	95	76.4		77.1	83.8	257	93	57.3		51	57	164	34	15	0		22.5	31	99	9.7	4.6	1
1	3.5	43	326.4	0	24	1	0		59.8	85.9	326.4	95.6	78.9		33.9	59.2	404.9	7.9	5.3		58.9	56.8	227.7	4.5	2.1	1		36.3	47.9	28.9	5.6	1.9	1
0	5.8	72	304.4	1	17	1	1		288.3	324.4	304.4	137	105.8		355	387	395	168	124		105	134	207	113	67	0		61	43	98	18.6	11.2	1
1	4.4	88	288	1	18	0	0		418	416	288	182.2	140.3		206	127	1299	22.9	144.5		368	61	384	65	82	0		113	34	163	36.3	18.6	0
1	4.2	74	286	0	24	0	0		191	157	286	156.8	116.7		157	31.7	2236.1	129	82.7		139	41	2345	126.3	96.5	0		103	55.1	830.8	39.1	19.3	0
0	4.5	43	244	1	3	0	0		112	78.8	244	112.6	48.9		85	117.0	840.0	22.1	15.8		59	68.7	1262.8	76.8	56.8	0		81	82.8	1446.9	46.8	22.6	0
0	6	81	230	0	24	1	0		117	111	230	140.1	105.5		139	252.7	1003	68.4	51.8		46.4	70	384.7	15.4	12.8	1		97	99	152	6.5	4.2	1
1	5.7	44	230	1	6	1	0		50	36	230	111.4	87.4		19	75	755	22.2	18.2		90	91	540	4.8	4.1	1		37	41	104	2.8	1.3	1
1	5.1	43	229.1	0	24		0		84.1	159.1	229.1	108.4	86.2		69	134	1458	39	61
1	7	72	211	1	13	0	0		758	709	211	258.5	190.5		149	65	629	164.2	128.6		209	75	752.2	106.6	72.1	0		89	105	416	66.7	35.1	0
1	4	62	211	0	24	1	0		103	70	211	134.8	103.7		242	298.5	1018.3	90.3	66.9		149	271	1725	30.6	24.4	0		42	46	186	6.9	3.2	1
0	6.6	60	198.8	1	5	0	1		595.2	733.1	198.8	146.6	119.3		489	793.2	245	189	167		281	348	157.5	102	92	0		129	143	67	34	33.5	0
0	3	31	197.3	1	10	0	1		353.5	52	197.3	110.5	79.8		59	62	562	47.6	32.1		112	164	2041	106	75.6	0		69	122	1767	100.6	88.3	0
0	6.8	88	154	1	6	0	1		154	528	154	180	134		355	198	874	68.6	54		238	237	573	112.8	109.5	0		193.6	175	361.3	194.4	132.1	0
1	4.5	51	142.3	0	24	0	0		101.3	173.2	142.3	186.9	141.4		48.5	343.8	191.4	146.4	113.4		41.3	299	168	133	102	0		31	91.6	83.1	67	34	0
1	5.7	80	136.8	1	13	1	0		172.6	201.5	136.8	139.3	98.8		68	89	238	42.8	25.5		38.1	73.8	187	37.4	19.6	1		46.7	37.4	81	9.3	8.8	1
1	4	55	124.8	1	11		1		196.4	288.8	124.8	172.6	143.4		75	210	642.6	139.4	115.2
1	3.62	63	118.4	1	8	0	0		89	103	118.4	112.1	92.5		115	168	134	138.5	103		73.5	105	116.7	112.6	101.6	0		38.6	31.7	95	61	26	0
